# Supplementary material for: Hierarchical TiO2 nanobelts@MnO2 ultrathin nanoflakes core–shell array electrode materials for supercapacitors
Source: Royal Society of Chemistry journal article supplement (doi:10.1039/c3ra42229a), 2013-01-01
Supplement: c3ra42229a.pdf [file c3ra42229a.pdf]

# Supporting Information

## Hierarchical TiO<sub>2</sub> Nanobelts@MnO<sub>2</sub> Ultrathin Nanoflakes Core/Shell Arrays Electrode Materials for Supercapacitors

Yongsong Luo,<sup>†a,b,d</sup> Dezhi Kong,<sup>†a,b</sup> Jingshan Luo,<sup>a</sup> Shi Chen,<sup>a</sup> Deyang Zhang,<sup>b</sup> Kangwen Qiu,<sup>b</sup>  
Xiaoying Qi,<sup>c</sup> Hua Zhang,<sup>c</sup> Chang Ming Li<sup>d</sup> and Ting Yu<sup>\*a,e,f</sup>

<sup>a</sup> *Division of Physics and Applied Physics, School of Physical and Mathematical Sciences, Nanyang Technological University, 637371, Singapore*

<sup>b</sup> *Department of Physics & Electronic Engineering, Xinyang Normal University, Xinyang 464000, P. R. China*

<sup>c</sup> *School of Materials Science and Engineering, Nanyang Technological University, 639798, Singapore*

<sup>d</sup> *Institute for Clean Energy and Advanced Materials, Southwest University, Chongqing 400700, P. R. China*

<sup>e</sup> *Energy Research Institute at Nanyang Technological University (ERIAN), 639789 Singapore*

<sup>f</sup> *Department of Physics, Faculty of Science, National University of Singapore, 117542 Singapore*

---

\* To whom correspondence should be addressed: E-mail: [yuting@ntu.edu.sg](mailto:yuting@ntu.edu.sg) (T. Yu).

† These authors contribute equally to this work.

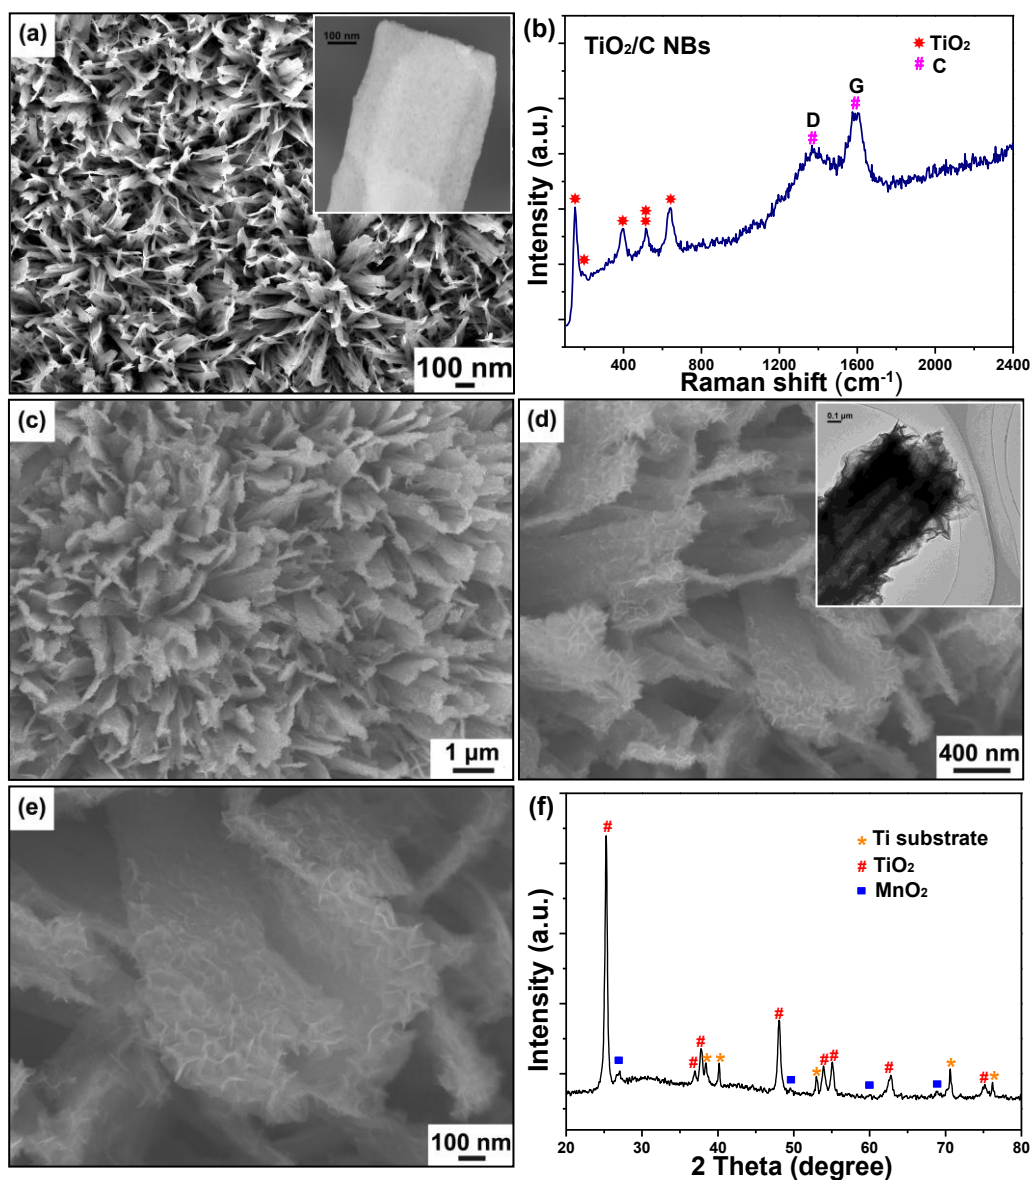

**Fig. S1** (a) SEM image of the carbon-coated TiO<sub>2</sub> nanobelt arrays. The inset shows enlarged images. (b) Raman spectrum of the carbon-coated TiO<sub>2</sub> NBs. (c,d,e) Low-magnification and enlarged SEM images of the TiO<sub>2</sub>@MnO<sub>2</sub> nanobelt arrays obtained after 3 h of growth, and TEM image of a TiO<sub>2</sub> nanobelt was shown in the insets of (d). (f) XRD patterns of as-prepared TiO<sub>2</sub>@MnO<sub>2</sub> nanobelt arrays obtained after 3 h of growth.

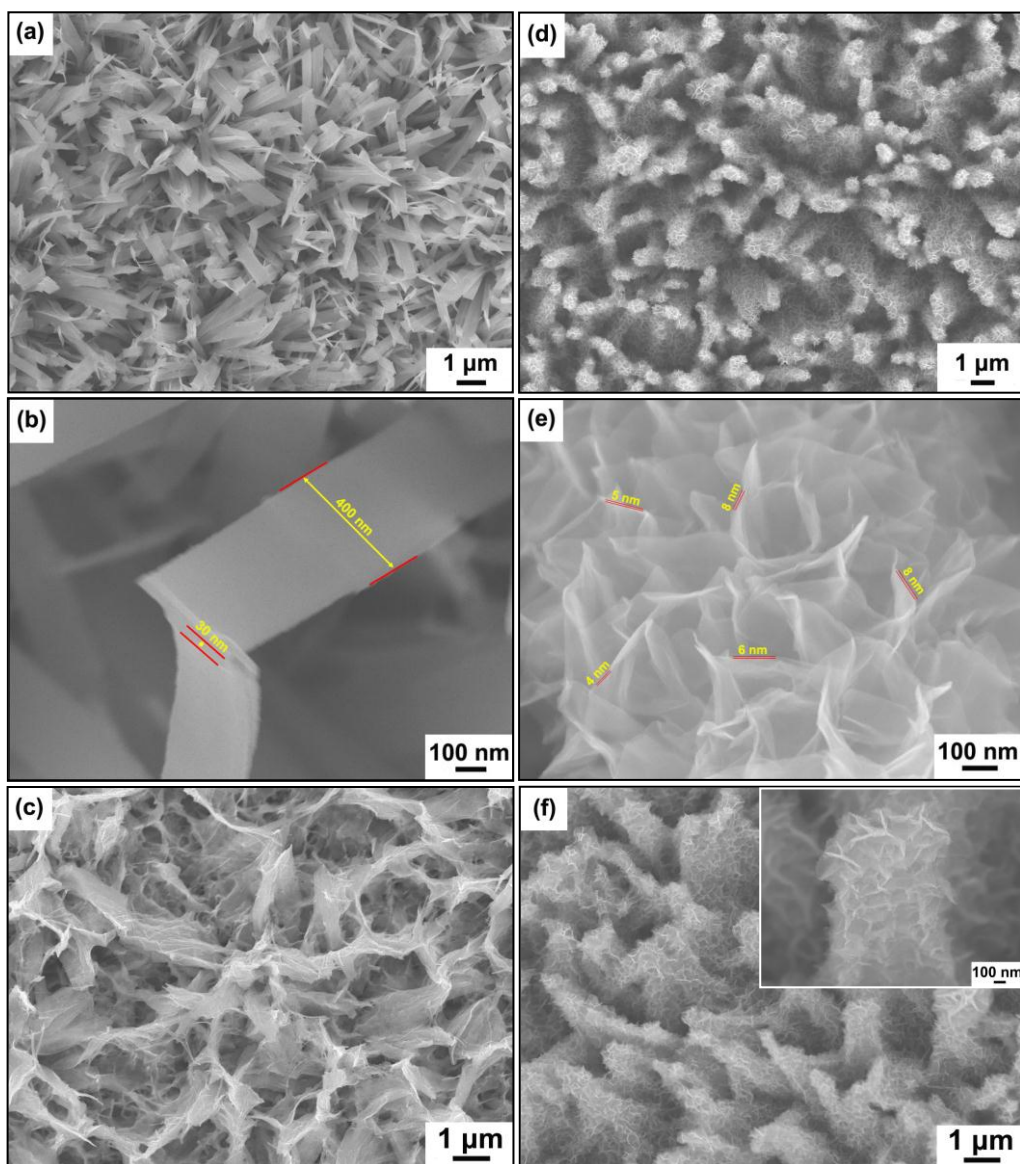

**Fig. S2** (a, b) Low-magnification and enlarged SEM images of the TiO<sub>2</sub> nanobelt arrays. (c) SEM image of the TiO<sub>2</sub> nanobelt arrays after 3000 cycles. (d, e) Low-magnification and enlarged SEM images of the TiO<sub>2</sub>@MnO<sub>2</sub> nanobelt arrays. (f) SEM image of the TiO<sub>2</sub>@MnO<sub>2</sub> nanobelt arrays after 3000 cycles. The inset shows enlarged images.

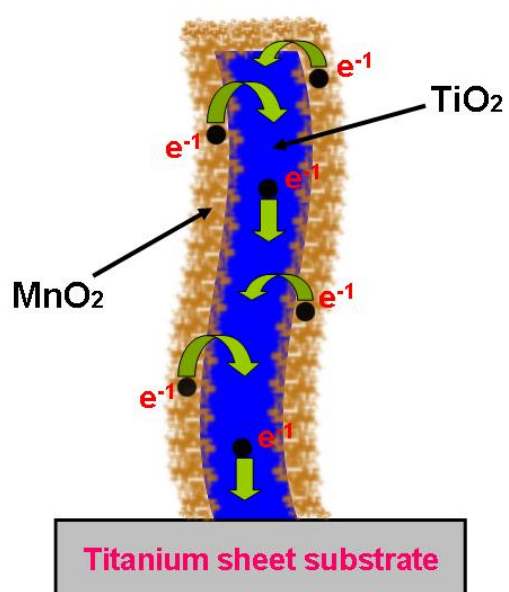

**Fig. S3** Schematic image of the amorphous MnO<sub>2</sub> loaded on the TiO<sub>2</sub> nanobelt grown on the titanium steel substrate. The TiO<sub>2</sub> nanobelt provides a direct path for the electrons.

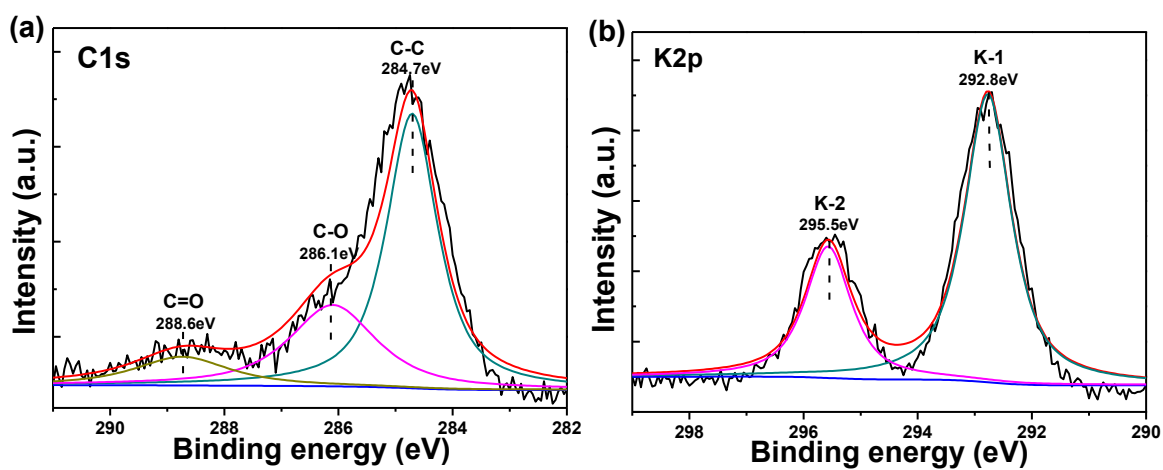

Fig. S4 (a) C1s XPS spectra; (b) K2p XPS spectra for the  $\text{TiO}_2@ \text{MnO}_2$  NBAs obtained after 5 h of growth.

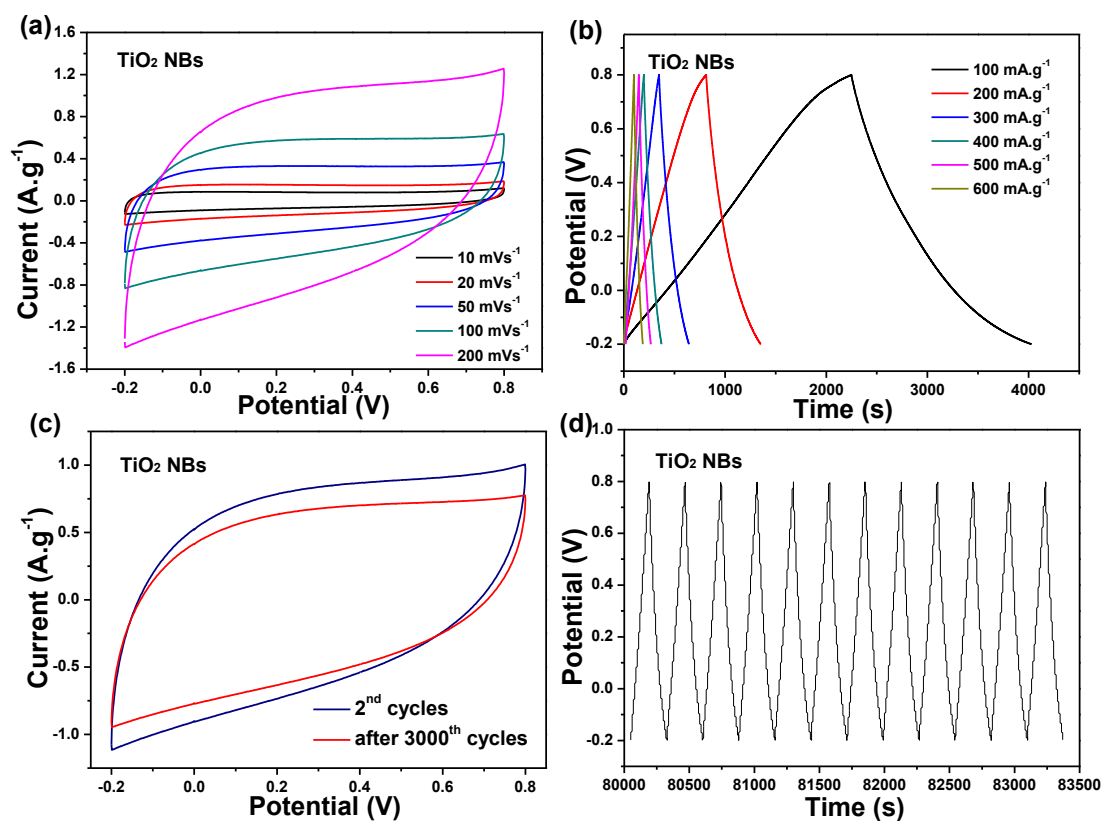

**Fig. S5** (a) The cyclic voltammogram (CV) curves of TiO<sub>2</sub> NBs at different scan rates. (b) Charge/discharge curves of TiO<sub>2</sub> NBs at various current densities. (c) Comparison of the CV curves for TiO<sub>2</sub> NBs between 2<sup>nd</sup> cycles and after 3000<sup>th</sup> cycles for CV test at 200mV s<sup>-1</sup>. (d) The charge/discharge curves of the last 12 cycles at 3 A g<sup>-1</sup> for the TiO<sub>2</sub> NBs.

**Table 1. Specific capacitance, power density, and energy density of the TiO<sub>2</sub>/MnO<sub>2</sub> NBAs composite at different current densities (based on the mass of MnO<sub>2</sub>)**

|                                                  |            |              |             |              |              |
|--------------------------------------------------|------------|--------------|-------------|--------------|--------------|
| <b>current density (A g<sup>-1</sup>) =</b>      | <b>2</b>   | <b>1</b>     | <b>0.8</b>  | <b>0.5</b>   | <b>0.2</b>   |
| <b>specific capacitance (F g<sup>-1</sup>) =</b> | <b>54</b>  | <b>128.4</b> | <b>160</b>  | <b>242.5</b> | <b>454.2</b> |
| .....                                            |            |              |             |              |              |
| <b>power density (kW kg<sup>-1</sup>) =</b>      | <b>1</b>   | <b>0.5</b>   | <b>0.4</b>  | <b>0.25</b>  | <b>0.1</b>   |
| <b>energy density (Wh kg<sup>-1</sup>) =</b>     | <b>7.5</b> | <b>17.8</b>  | <b>22.2</b> | <b>33.7</b>  | <b>63.1</b>  |
